# Supplementary material for: Chronic IL-15 Stimulation and Impaired mTOR Signaling and Metabolism in Natural Killer Cells During Acute Myeloid Leukemia
Source: Front Immunol. 2021 Dec 17;12:730970. doi: 10.3389/fimmu.2021.730970 (PMC8718679; doi:10.3389/fimmu.2021.730970)
Supplement: Supplementary file 7 [file Table_1.xlsx]

## Sheet: Feuil1
	Antibodies used for Flow Cytometry
	Mouse antigen	Fluorochrome	Clone	Provider	Catalog Number
	CD107a	FITC	1D4B	BD Biosciences	553793
	CD11b	FITC	M1/70	eBiosciences	11-0112-85
		PerCP-Cy5.5	M1/70	BD Biosciences	550993
		BV421	M1/70	BD Biosciences	562605
	CD122	BV605	TM-β1	BD Biosciences	740349
		eFluor 450	TM-β1	eBiosciences	48-1222-82
	CD132	APC	TUGm2	Biolegend	132307
	CD19	APC-Cy7	1D3	BD Biosciences	557655
		Biotin	6D5	Biolegend	115504
		BV605	1D3	BD Biosciences	563148
	CD25	PE	PC61	BD Biosciences	553866
		PE-Cy7	PC61.5	eBiosciences	25-0251-82
	CD27	PE-Cy7	LG.3A10	BD Biosciences	563604
	CD3	APC-Cy7	145-2C11	BD biosciences	557596
		APC-Vio770	REA641	Miltenyi	130-109-840
		Biotin	145-2C11	Biolegend	100304
	CD335 (NKp46)	FITC	29A1.4	eBiosciences	11-3351-82
		BV605	29A1.4	Biolegend	137619
	CD45.1	FITC	A20	BD Biosciences	553775
		PE-CF594	A20	BD Biosciences	562452
		Biotin	A20	eBiosciences	13-0453-85
	CD45.2	eFluor 450	104	eBiosciences	48-0454-82
		Biotin	104	eBiosciences	13-0454-85
	CD69	FITC	H1.2F3	BD Biosciences	553236
		PE	H1.2F3	eBiosciences	12-0691-82
	CD71	PerCP-eFluor710	RI7 217.1.4	eBiosciences	46-0711-82
	CD98	PE	RL388	Biolegend	128207
	EOMES	APC	REA116	Miltenyi	130-102-917
	Granzyme B	FITC	REA226	Miltenyi	130-101-356
	IFN-γ	PE	XMG1.2	eBiosciences	12-7311-81
	Ki67	FITC	B56	BD Biosciences	556026
	NK1.1	APC	PK136	BD Biosciences	550627
		PE	REA1162	Miltenyi	130-120-497
		BV650	PK136	BD Biosciences	564143
	Perforin	PE	eBioOMAK-D	eBiosciences	12-9392-82
	pS6 (Ser235/236)	AF647	D57.2.2E	Cell Signaling technology	14733
	pSMAD2/3	PE	O72-670	BD Biosciences	562586
	pSTAT5	PE	47/Stat5(pY694)	BD Biosciences	562077
	T-bet	PE-CF594	O4-46	BD Biosciences	562467
	TIGIT	APC	1G9	Biolegend	142105
	Human antigen	Fluorochrome	Clone	Provider	Catalog Number
	CD71	FITC	M-A712	BD Biosciences	555536
	CD98	PE	UM7F8	BD Biosciences	556077
	PD-1	BV421	EH12.1	BD Biosciences	562516
	TIGIT	PerCP-eF710	MBSA43	eBiosciences	46-9500-42
	CD45	APC	HI100	BD Biosciences	550855
	CD3	BV605	SK7	BD Biosciences	563219
	CD56	Pe-Vio770	REA196	Miltenyi	130-113-313
	CD122	Biotin	Mik-β3	BD Biosciences	554524
